# Supplementary material
Source: PubMed Central journal article supplement (PMC4899242)
Supplement: NIHMS776475-supplement-3.pdf [file NIHMS776475-supplement-3.pdf]

## Supplemental Information

### "The mechanism and structural basis of indirect DNA sequence recognition and its impact on gene targeting by meganucleases"

Abigail R. Lambert, Jazmine P. Hallinan, Betty W. Shen, Jennifer K. Chik,  
Jill M. Bolduc, Nadia Kulshina, Lori I. Robins, Brett K. Kaiser, Jordan Jarjour,  
Kyle Havens, Andrew M. Scharenberg and Barry L. Stoddard

#### Supplemental Figures and Tables

**Figure S1.** Meganuclease thermal denaturation profiles and stabilities (Related to Figure 1)

**Figure S2.** Protein-DNA contact map for meganuclease N-terminal domains (Related to Figure 2)

**Figure S3.** Protein-DNA contact map for meganuclease C-terminal domains (Related to Figure 2)

**Figure S4.** Schematic of flow cytometric assays for (a) meganuclease expression (b) DNA binding and (c) DNA cleavage (Related to Figure 3)

**Figure S5.** Analysis and Quantification of Flow Cytometric Binding and Cleavage Data (Related to Figure 4)

**Figure S6.** Tethered flow cleavage assays for I-PanMI against DNA substrates containing all possible 'central 4' basepair sequence combinations (Related to Figure 5)

**Figure S7.** Overall DNA bending induced by binding of I-SmaMI to wildtype and mutated DNA target sequences (Related to Figure 6)

**Figure S8.** Central four cleavage specificity of I-SmaMI in the presence of  $Mg^{2+}$  vs.  $Mn^{2+}$  (Related to Figure 6)

**Table S1.** I-OnuI family meganucleases characterized in this study

**Supplemental Data File S1 (zipped file).** Binding and cleavage data file for the 9 individual meganucleases described in this study. Related to Figures 3 and 4.

#### Supplemental Experimental Procedures

1. Meganuclease Sequences (coding and translated)
2. Enzyme expression, purification, biochemical analyses, crystallization and X-ray data collection
3. Meganuclease Target Site Prediction
4. Generation of DNA Substrates for Assays of Binding and Cleavage

Figure S1, related to Figure 1. Meganuclease thermal denaturation profiles and stabilities.

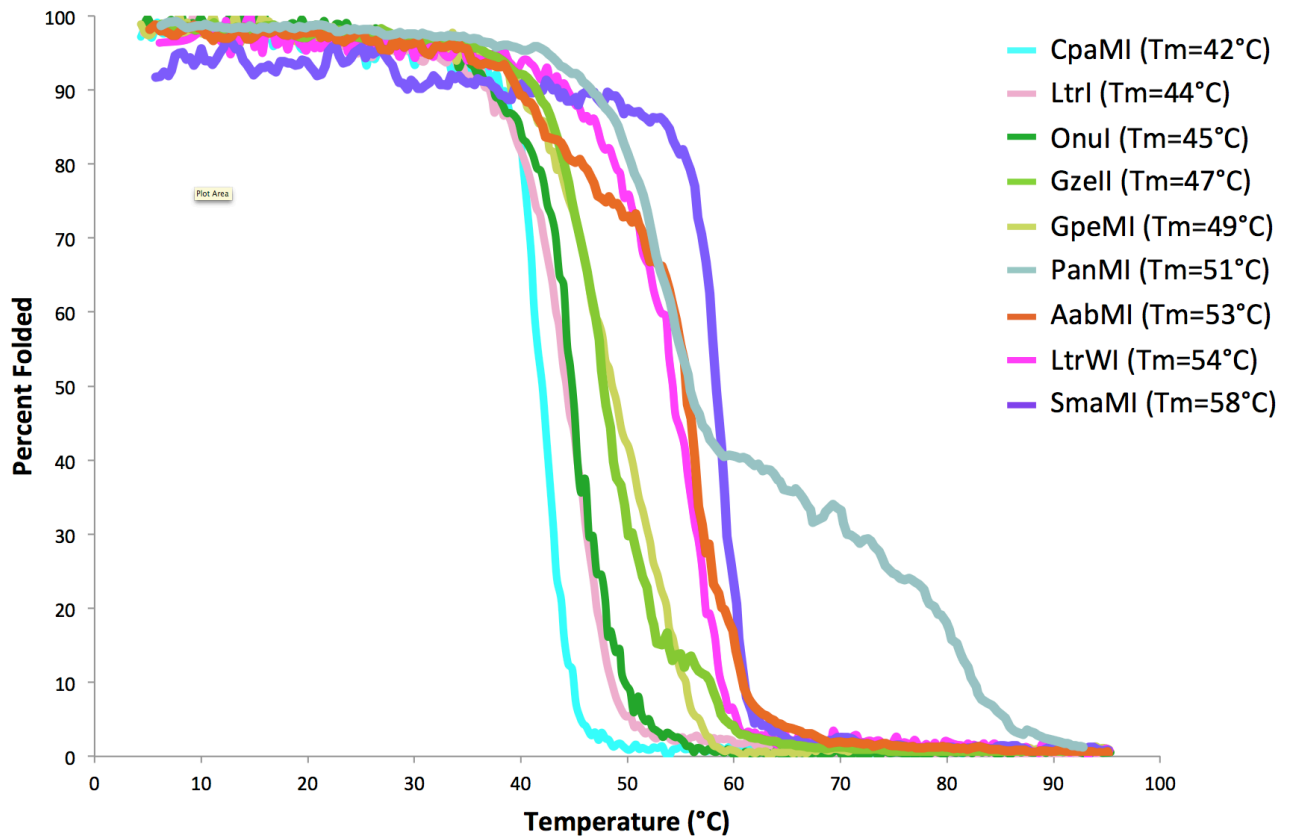

**Figure S2, related to Figure 2. Protein-DNA contact map for N-terminal megaluclease domains.** Colors match the corresponding protein structures from Figure 1. Blacked out regions indicate the absence of a DNA contact for that particular position while dashes indicate the absence of the amino acid itself at that position.

| Domain     | Tertiary Structure    | Secondary Structure | Position Name | OnuI | GpeMI | CpaMI | LtrI | LtrWI | PanMI | GzeII | SmaMI | AabMI |
|------------|-----------------------|---------------------|---------------|------|-------|-------|------|-------|-------|-------|-------|-------|
| N Terminal | LAGLIDADG             | Alpha 1             | A1_P1         | 20D  | 19D   | 16D   | 27D  | 20D   | 18D   | 17D   | 18D   | 11D   |
|            |                       |                     | A1_P2         | 21A  | 18A   | 17A   | 28A  | 21A   | 19G   | 18A   | 19A   | 12G   |
|            |                       |                     | A1_P3         | 22E  | 19E   | 18E   | 29E  | 22E   | 20E   | 19E   | 20E   | 13E   |
|            | Beta Sheet N Terminal | LoopA1-B1           | A1/B1_P1      | 23G  | 20G   | 19C   | 30S  | 23G   | 21G   | 20G   | 21G   | 14G   |
|            |                       |                     | B1_P1         | 24S  | 21S   | 20S   | 31S  | 24S   | 22S   | 21S   | 22S   | 15C   |
|            |                       | Beta 1              | B1_P2         | 25F  | 19F   | 21F   | 32F  | 25F   | 23F   | 22F   | 23F   | 16F   |
|            |                       |                     | B1_P3         | 26L  | 23I   | 22S   | 33M  | 26G   | 24M   | 23M   | 24M   | 17R   |
|            |                       |                     | B1_P4         | 27L  | 24L   | 23I   | 34L  | 27V   | 25L   | 24I   | 25V   | 18I   |
|            |                       |                     | B1_P5         | 28R  | 25R   | 24L   | 35T  | 28N   | 26T   | 25H   | 26R   | 19S   |
|            |                       |                     | B1_P6         | 30R  | 27R   | 26Q   | 37S  | 30V   | 28I   | 27E   | 28R   | 21T   |
|            |                       |                     | B1/B2_P1      | 32N  | 29N   | 29S   | 39D  | 32H   | 30D   | 29N   | 30N   | 22K   |
|            |                       | LoopB1-B2           | B1/B2_P2      | 34K  | 31K   | 30K   | 41K  | 34T   | 32K   | -     | 32K   | -     |
|            |                       |                     | B1/B2_P3      | 35S  | 32S   | 31Y   | 42R  | 35N   | 33Y   | -     | 33Y   | -     |
|            |                       |                     | B1/B2_P4      | 36S  | 33S   | 32S   | 43N  | 36K   | 34K   | 32K   | 34K   | -     |
|            |                       |                     | B1/B2_P5      | 37V  | 34A   | 33T   | 44T  | 37T   | 35L   | -     | 35T   | -     |
|            |                       | Beta 2              | B2_P1         | 40S  | 37S   | 36R   | 47S  | 40A   | 38R   | 34R   | 38L   | 30R   |
|            |                       |                     | B2_P2         | 41T  | 38T   | 37I   | 48V  | 41V   | 39V   | 35V   | 39V   | 31V   |
|            |                       |                     | B2_P3         | 42E  | 39E   | 38K   | 49R  | 42L   | 40V   | 36R   | 40V   | 32Q   |
|            |                       |                     | B2_P4         | 44G  | 41G   | 40V   | 51R  | 44Y   | 42R   | 38T   | 42I   | 34F   |
|            |                       |                     | B2_P5         | 46Q  | 43Q   | 42A   | 53R  | 46E   | 44V   | 40Q   | 44S   | 36Q   |
|            |                       |                     | B2_P6         | 48T  | 45T   | 44G   | 55G  | 48A   | 46S   | 42K   | 46T   | 38N   |
|            |                       |                     | B2_P7         | 49L  | 46L   | 45L   | 56L  | 49M   | 47L   | 43L   | 47V   | 39L   |
|            |                       |                     | B2_P8         | 50H  | 47H   | 45H   | 57H  | 50N   | 48H   | 44D   | 48D   | 40H   |
|            | B2_P9                 |                     | 53D           | 50D  | 49D   | 60D   | 53D  | 51D   | 47D   | 51D   | 43D   |       |
|            | Beta 3                | B3_P1               | 68V           | 65V  | 64K   | 75I   | 69N  | 66N   | 63S   | 67S   | 58K   |       |
|            |                       | B3_P2               | 70A           | 67A  | 66H   | 77T   | 71Y  | 68F   | 65N   | 69K   | 60H   |       |
|            |                       | B3_P3               | 71N           | 68N  | 67I   | 78S   | 72H  | 69L   | 66T   | 70K   | 61I   |       |
|            | LoopB3-B4             | B3/B4_P1            | 72S           | 69S  | 68H   | 79D   | 73N  | 70M   | -     | 71S   | 62S   |       |
|            |                       | B3/B4_P2            | 73G           | 70G  | 69G   | 80I   | 74P  | 71T   | 67S   | 72G   | 63G   |       |
|            |                       | B3/B4_P3            | 75N           | -    | -     | -     | 76D  | -     | 69K   | 74S   | -     |       |
|            | Beta 4                | B4_P1               | 76A           | 73A  | 72T   | 81D   | 78T  | 74S   | 70E   | 75T   | 66L   |       |
|            |                       | B4_P2               | 78S           | 75S  | 74Q   | 83R   | 80K  | 76Q   | 72V   | 77S   | 68Q   |       |
|            |                       | B4_P3               | 80K           | 77K  | 76R   | 85R   | 82K  | 78R   | 74K   | 79R   | 70R   |       |
|            | LoopB4-A3             | B4/A3_P1            | 82T           | 79T  | 78D   | 87E   | 84S  | 80E   | 76R   | 81E   | 72Q   |       |
|            |                       | B4/A3_P2            | 83R           | 80R  | 79S   | 88S   | 85N  | 81S   | 77S   | 82S   | 73T   |       |
|            |                       | B4/A3_P3            | 84F           | 81F  | 80P   | 89L   | 86I  | 82L   | 78L   | 83S   | 74F   |       |
|            |                       | B4/A3_P4            | 85E           | 82E  | 81K   | 90K   | 87D  | 83K   | 79K   | 84E   | 75D   |       |
|            | Alpha 4               | A4_P1               | 103K          | 100K | 99K   | 108K  | 106K | 118K  | 97K   | 103K  | 93K   |       |
|            |                       | A4/A5_P1            | 117M          | 114M | 113I  | 122I  | 120I | 115I  | 111L  | 117   |       |       |
|            | LoopA4-A5             | A4/A5_P2            | 120K          | 117K | 116K  | 125K  | 123K | 118K  | 114Q  | 120K  | 110N  |       |
|            |                       | A4/A5_P3            | 122H          | 119H | 118H  | 127H  | 125H | 120H  | 116H  | 122H  | 112H  |       |
|            |                       | A4/A5_P4            | 123L          | 120L | 119L  | 128L  | 126L | 121L  | 117L  | 123L  | 113L  |       |
|            |                       | A4/A5_P5            | -             | -    | -     | -     | -    | -     | 118S  | -     | -     |       |
|            | Alpha 5               | A5_P1               | 135K          | 132K | 131K  | 140K  | 138K | 133K  | 133R  | 135K  | 125K  |       |
|            |                       | A5/A6_P1            | 138L          | 135L | 134L  | 143L  | 141M | 136I  | 136M  | 138I  | 128L  |       |
|            | LoopA5-A6             | A5/A6_P2            | 139N          | 136N | 135N  | 144N  | 142N | 137N  | 137N  | 139N  | 129N  |       |
|            |                       | A5/A6_P3            | 140W          | 137W | 136L  | 145L  | 143L | 138N  | 138L  | 140K  | 130L  |       |
|            |                       | A5/A6_P4            | 141G          | 138G | 137G  | 146G  | 144G | 139G  | 139G  | 139G  | 131G  |       |
|            |                       | A5/A6_P5            | 143T          | 140T | 139N  | 148S  | 146S | 141N  | 141S  | 143S  | 133S  |       |

|                | -11 | -10 | -9 | -8 | -7 | -6 | -5 | -4 | -3       | -2       | -1       | 1 | 2 | 3 | 4 | 5 | 6 | 7 | 8 | 9 | 10 | 11 |
|----------------|-----|-----|----|----|----|----|----|----|----------|----------|----------|---|---|---|---|---|---|---|---|---|----|----|
| <b>I-AabMI</b> | A   | G   | G  | T  | A  | C  | C  | C  | T        | <b>T</b> | <b>T</b> | A | A | A | C | C | T | A | C | T | A  | A  |
| <b>I-CpaMI</b> | T   | A   | G  | C  | C  | A  | C  | A  | <b>A</b> | <b>T</b> | A        | T | T | A | A | G | G | C | C | A | T  |    |
| <b>I-GpeMI</b> | T   | T   | T  | C  | C  | G  | C  | T  | T        | <b>A</b> | <b>T</b> | T | C | A | A | C | C | C | T | T | T  | A  |
| <b>I-GzeII</b> | A   | T   | G  | G  | G  | T  | A  | C  | C        | <b>A</b> | <b>T</b> | A | T | T | G | G | T | A | C | A | A  | A  |
| <b>I-LtrI</b>  | A   | A   | T  | G  | C  | T  | C  | C  | T        | <b>A</b> | <b>T</b> | A | C | G | A | C | G | T | T | T | A  | G  |
| <b>I-LtrWI</b> | A   | G   | T  | A  | G  | T  | G  | A  | A        | <b>G</b> | <b>T</b> | A | T | G | T | T | A | T | T | T | A  | A  |
| <b>I-OnuI</b>  | T   | T   | T  | C  | C  | A  | C  | T  | T        | <b>A</b> | <b>T</b> | T | C | A | A | C | C | T | T | T | T  | A  |
| <b>I-PanMI</b> | G   | C   | T  | C  | C  | T  | C  | A  | T        | <b>A</b> | <b>A</b> | T | C | C | T | T | A | T | C | A | A  | G  |
| <b>I-SmaMI</b> | T   | A   | T  | C  | C  | T  | C  | A  | <b>T</b> | <b>T</b> | A        | T | C | A | G | G | T | G | T | A | C  |    |

**Figure S3, related to Figure 2. Protein-DNA contact map for C-terminal megaluclease domains.** Colors match the corresponding protein structures from Figure 1. Blacked out regions indicate the absence of a DNA contact for that particular position while dashes indicate the absence of the amino acid itself at that position.

| C Terminal            | LAGLIDADG          | Alpha 7             | A7_P1         | 176S | 181S  | 175S  | 182A | 179E  | 185D  | 175S  | 177S  | 167S  |   |
|-----------------------|--------------------|---------------------|---------------|------|-------|-------|------|-------|-------|-------|-------|-------|---|
|                       |                    |                     | A7_P2         | 177G | 182G  | 176G  | 183G | 180G  | 176A  | 176G  | 178G  | 168A  |   |
|                       |                    |                     | A7_P3         | 178E | 183E  | 177D  | 184E | 181E  | 177E  | 177E  | 179D  | 169E  |   |
| Beta Sheet C Terminal | Beta 5             | B5_P1               | 179G          | 184G | 178S  | 185G  | 182A | 178G  | 176G  | 180G  | 170G  |       |   |
|                       |                    | B5_P2               | 180C          | 185C | 179S  | 186S  | 183C | 179C  | 179S  | 181S  | 171C  |       |   |
|                       |                    | B5_P3               | 181F          | 186F | 180F  | 187F  | 184F | 180F  | 180F  | 180F  | 182F  | 172F  |   |
|                       |                    | B5_P4               | 182F          | 187F | 181N  | 188Y  | 185F | 181S  | 181S  | 181S  | 183K  | 173M  |   |
|                       |                    | B5_P5               | 183V          | 188V | 182V  | 189I  | 186V | 182V  | 182V  | 182V  | 184S  | 174V  |   |
|                       |                    | B5_P6               | 184N          | 189S | 183K  | 190R  | 187S | 183V  | 183Y  | 185I  |       |       |   |
|                       |                    | B5_P7               | 185L          | 190L | 184I  | 191I  | 188I | 184F  | 184T  | 186L  |       | 176I  |   |
|                       |                    | B5_P8               | 186I          | 191I | 185S  | 192A  | 189Y | 185F  | 185T  | 187K  |       | 177A  |   |
|                       |                    | B5_P9               | 187K          | 192K | 186N  | 193K  | 190N | 186K  | 186S  | 188K  |       | 178K  |   |
|                       | LoopB5-B6          | B5/B6_P1            | 188S          | 193S | 187S  | 194N  | 191S | 187S  | 187D  | 189S  | 179S  |       |   |
|                       |                    | B5/B6_P2            | 189K          | 194K | 189T  | 196T  | 193K | 189T  | -     | 191S  | 181A  |       |   |
|                       |                    | B5/B6_P3            | 190S          | 195S | 190S  | 197L  | 194S | 190S  | -     | 192I  | 182S  |       |   |
|                       |                    | B5/B6_P4            | 191K          | 196K | 191L  | 198K  | 195K | 191K  | -     | 193K  | 183S  |       |   |
|                       | Beta 6             | B6_P1               | 195Q          | 200Q | 195R  | 202Q  | 199A | 195A  | 190Y  | 197Q  | 187Q  |       |   |
|                       |                    | B6_P2               | 196V          | 201V | 196V  | 203V  | 200V | 196V  | 191V  | 198S  | 188V  |       |   |
|                       |                    | B6_P3               | 197Q          | 202Q | 197Q  | 204Q  | 201Q | 197K  | 192S  | 199I  | 189Y  |       |   |
|                       |                    | B6_P4               | 199V          | 204V | 199R  | 206V  | 203V | 199S  | 194S  | 201V  | 191T  |       |   |
|                       |                    | B6_P5               | 201S          | 206S | 201G  | 208Q  | 205K | 201I  | 196R  | 203Q  | 193I  |       |   |
|                       |                    | B6_P6               | 203T          | 208T | 203G  | 210T  | 207T | 203T  | 198S  | 205T  | 195T  |       |   |
|                       |                    | B6_P7               | 204Q          | 209Q | 204L  | 211Q  | 208Q | 204Q  | 199Q  | 206Q  | 196Q  |       |   |
|                       | LoopB6-A8          | B6/A8_P1            | 205H          | 210H | 205N  | 212D  | 209H | 205S  | 200H  | 207H  | 197H  |       |   |
|                       |                    | B6/A8_P2            | 207K          | 212R | 207R  | 214R  | 211R | 207R  | 202K  | 209R  | 199R  |       |   |
|                       | Beta 7             | B7_P1               | -             | -    | 226K  | -     | -    | -     | -     | -     | -     |       |   |
|                       |                    | B7_P2               | 222Y          | 228Y | 227N  | 230N  | 227R | 223N  | 217G  | 225F  | 215R  |       |   |
|                       |                    | B7_P3               | 223I          | 229I | 228I  | 231I  | 228V | 224T  | 218F  | 226I  | 216   |       |   |
|                       |                    | B7_P4               | 225K          | 230K | 229Y  | 232R  | 229E | 225S  | 220N  | 227E  | 217A  |       |   |
|                       |                    | B7_P5               | 227K          | 232K | -     | 234R  | 231R | 227D  | 222H  | 229D  | 219K  |       |   |
|                       |                    | B7_P6               | 228N          | 233K | -     | 235K  | 232K | 228P  | 223N  | 230S  | -     |       |   |
|                       |                    | B7_P7               | 229K          | 234K | -     | -     | -    | -     | 224K  | 231R  | 220R  |       |   |
|                       | Beta 8             | B8_P1               | 232F          | 237F | -     | -     | -    | -     | -     | -     | -     |       |   |
| B8_P2                 |                    | 233S                | 238S          | -    | 245T  | 235E  | 230G | 227K  | 233P  | 221N  |       |       |   |
| B8_P3                 |                    | 234W                | 239W          | 234S | 246C  | 236A  | 231T | 228A  | 234W  | 222V  |       |       |   |
| B8_P4                 |                    | 236D                | 241E          | 236R | 248D  | 238D  | 233D | 230I  | 236Y  | 224E  |       |       |   |
| B8_P5                 |                    | 238V                | 243V          | 238E | 250V  | 242T  | 235K | 232V  | 238T  | 226Q  |       |       |   |
| LoopB8-A9             | B8/A9_P1           | 240T                | 245T          | 240V | 252T  | 241V  | 237T | 234R  | 240T  | 228S  |       |       |   |
|                       | B8/A9_P2           | 241K                | 246K          | 241K | 253N  | 242S  | 238N | 235K  | 241N  | 229K  |       |       |   |
|                       | B8/A9_P3           | 242F                | 247F          | 242F | 254L  | 244I  | 239F | 236F  | 242F  | 230F  |       |       |   |
|                       | B8/A9_P4           | 243S                | 248S          | 243S | 255D  | 245K  | 240S | 237E  | 243S  | 231S  |       |       |   |
| Alpha 10              | A10_P1             | 262K                | 267K          | 262K | 274K  | 264K  | 259K | 256K  | 262K  | 249K  |       |       |   |
|                       | A10_P2             | 265D                | 284K          | 265D | 277D  | 267N  | 262D | 259D  | 265D  | 252D  |       |       |   |
| LoopA10-A11           | A10/A11_P1         | 281H                | 286H          | 281H | 293H  | 283H  | 278H | 275H  | 281H  | 268H  |       |       |   |
|                       | A10/A11_P2         | 282L                | 287L          | 282L | 294L  | 284L  | 279L | 276L  | 282L  | 269L  |       |       |   |
| Alpha 11              | A11_P1             | 294K                | 299K          | 294K | 306K  | 296K  | 291R | 288K  | 294K  | 281K  |       |       |   |
|                       | A11_P2             | 297M                | 302M          | 297M | 309M  | 299M  | 294M | 291M  | 297M  | 284M  |       |       |   |
|                       | A11_P3             | 298N                | 303N          | 298N | 310N  | 300N  | 295N | 292N  | 298N  | 285N  |       |       |   |
|                       | A11_P4             | 299K                | 304K          | -    | 311R  | 301T  | 296T | 293S  | 299K  | 286R  |       |       |   |
|                       | A11_P5             | -                   | -             | -    | -     | -     | -    | 294Y  | -     | -     |       |       |   |
| Domain                | Tertiary Structure | Secondary Structure | Position Name | OnuI | GpeMI | CpaMI | LtrI | LtrWI | PanMI | GzeII | SmaMI | AabMI |   |
| I-AabMI               | A                  | G                   | G             | T    | A     | C     | C    | C     | T     | T     | T     | A     | A |
| I-CpaMI               | T                  | A                   | G             | C    | C     | C     | A    | C     | A     | A     | T     | A     | T |
| I-GpeMI               | T                  | T                   | T             | C    | C     | G     | C    | T     | T     | A     | T     | T     | A |
| I-GzeII               | A                  | T                   | G             | G    | G     | T     | A    | C     | C     | A     | T     | A     | A |
| I-LtrI                | A                  | A                   | T             | G    | C     | T     | C    | C     | T     | A     | T     | A     | G |
| I-LtrWI               | A                  | G                   | T             | A    | G     | T     | G    | A     | A     | G     | T     | A     | A |
| I-OnuI                | T                  | T                   | T             | C    | C     | A     | C    | T     | T     | A     | T     | T     | A |
| I-PanMI               | G                  | C                   | T             | C    | C     | T     | C    | A     | T     | A     | T     | A     | G |
| I-SmaMI               | T                  | A                   | T             | C    | C     | T     | C    | C     | A     | T     | T     | A     | C |

I-AabMI A G G T A C C C T T T A A A C C T A C T A A

I-CpaMI T A G C C C A C A A T A T T A A G G C C A T

I-GpeMI T T T C C G C T T A T T C A A C C C T T T A

I-GzeII A T G G G T A C C A T A T T G G T A C A A A

I-LtrI A A T G C T C C T A T A C G A C G T T T A G

I-LtrWI A G T A G T G A A G T A T G T T A T T T A A

I-OnuI T T T C C A C T T A T T C A A C C T T T T A

I-PanMI G C T C C T C A T A A T C C T T A T C A A G

I-SmaMI T A T C C T C C A T T A T C A G G T G T A C

**Figure S4, related to Figure 3. Schematic of flow cytometric assays for (a) meganuclease expression (b) DNA binding and (c) DNA cleavage. Panel a:** A plot of PE (N-terminal stain) vs. FITC (C-terminal stain) was examined for each enzyme to verify expression of full-length, stable protein on the surface of the yeast. **Panel b:** Yeast with surface-expressed meganuclease are stained with a FITC antibody to the C-terminal Myc epitope tag and incubated with fluorescently labeled DNA duplexes (A647 fluorophore) containing a sequence corresponding either to the wild-type target or to a target containing a single basepair substitution. By assaying the relative signal for bound DNA (A647) at concentrations corresponding to the approximate wild-type  $K_D$ , basepair substitutions that significantly reduce affinity can be identified. **Panel c:** Yeast with surface-expressed meganuclease are incubated with an anti-HA-biotin antibody, a streptavidin-PE stain, and fluorescently labeled DNA substrate (A647 fluorophore) containing a sequence corresponding to either to the wild-type target or a target containing a single basepair substitution. The biotin and streptavidin molecules create a physical tether of the DNA target substrate to the N-terminus of the protein. A plot of PE (N-term protein) vs. A647 (DNA) signals is collected for each DNA construct in both the presence of calcium (which facilitates binding but prevents cleavage) and in the presence of magnesium (which supports cleavage). By superimposing the calcium and magnesium plots, one can determine the relative cleavage activity against each DNA target by comparing loss of the A647 signal (representing cleavage of the tethered DNA target substrate, indicated by arrow.)

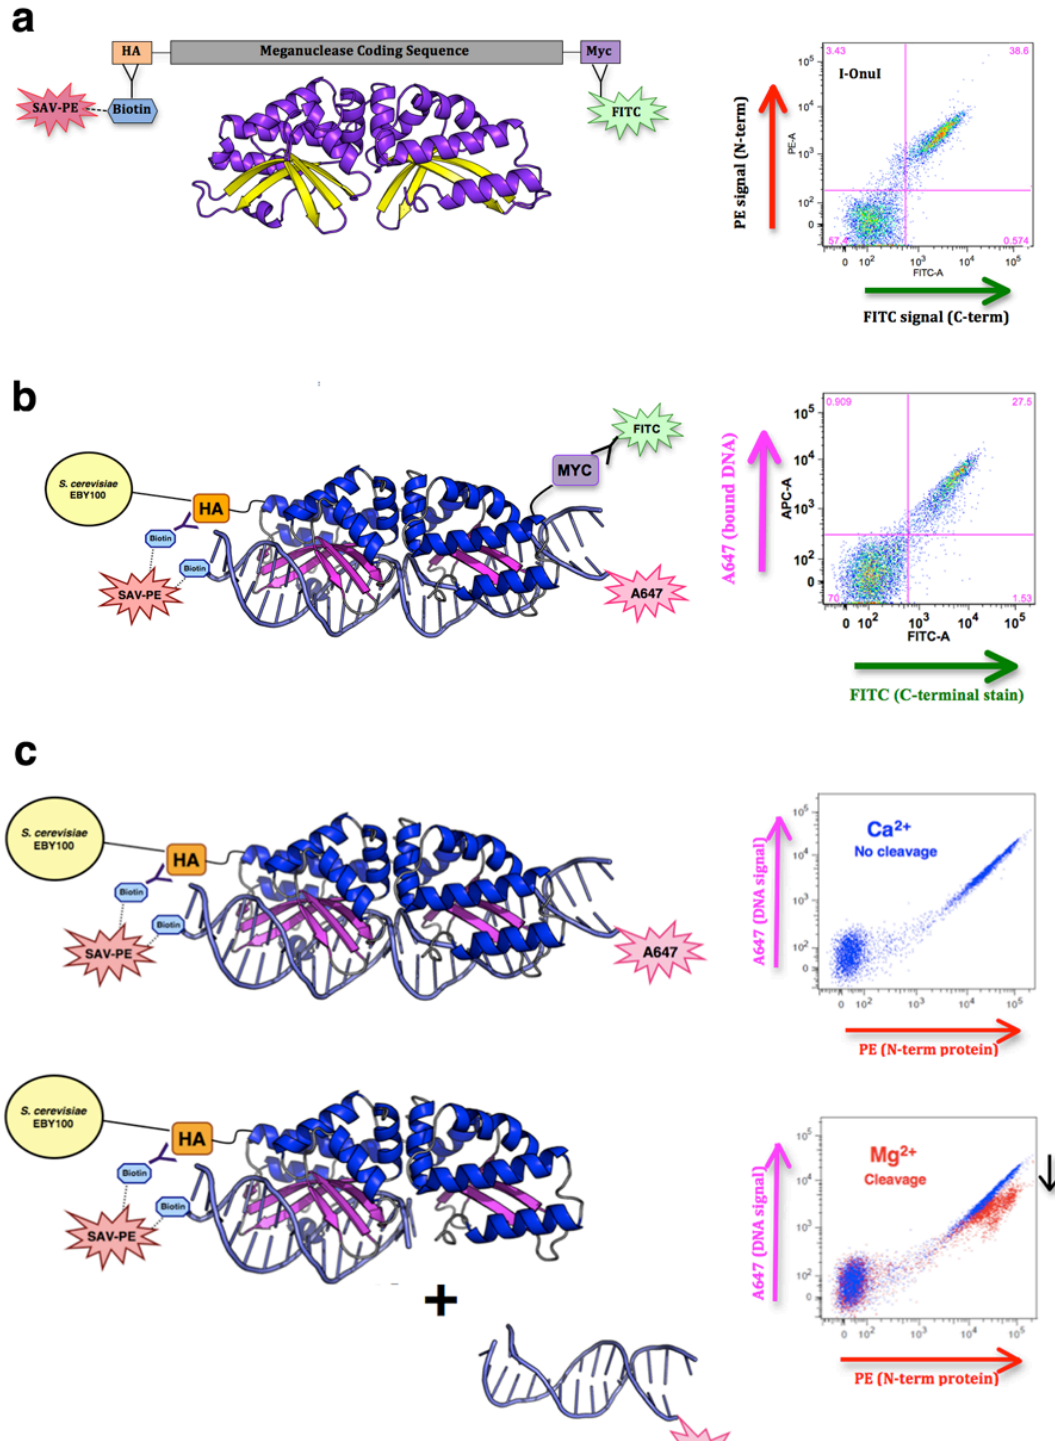

**Figure S5, related to Figure 4. Analysis and Quantification of Flow Cytometric Binding and Cleavage Data.** *Panel a:* Use the “no stain” control to draw a range gate that will include all cells with signal from bound DNA (A647/APC). This gate excludes the negative population. *Panel b:* Using the wild-type sample, draw a tight gate around the cells with signal for the bound DNA. Let the top of the gate extend upwards to include any samples that might have higher signal than wild-type. Activate the number/statistic for COUNT (number of cells) inside this gate. Use the numbers of cells inside the gate for quantification of binding relative to the wild-type sample. *Panel c:* Use a “no stain” control to draw a range gate for “Expressed” cells (cells with FITC signal). Apply to all samples. From this point forward, you will only be looking at cells with a FITC signal (cells with full-length expressed protein). *Panel d:* Draw a rectangular gate to capture a “slice” of the expressed cells (can be a thin or wide rectangle, but positioned at a FITC level that is uniform across all samples). Apply this gate to all samples. *Panel e:* Draw a second rectangular gate (thin) to create a “PE slice”. Apply to all samples. Activate the statistical value/number for MEDIAN APC signal inside this gate. For each sample, record values for the matched  $\text{Ca}^{2+}$  and the  $\text{Mg}^{2+}$  samples. The shift observed in this assay can be quantified by calculating the  $\text{Ca}^{2+}/\text{Mg}^{2+}$  ratio.

**a**

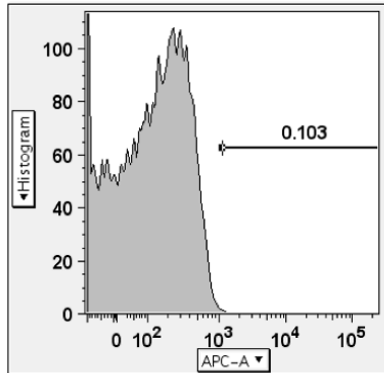

**b**

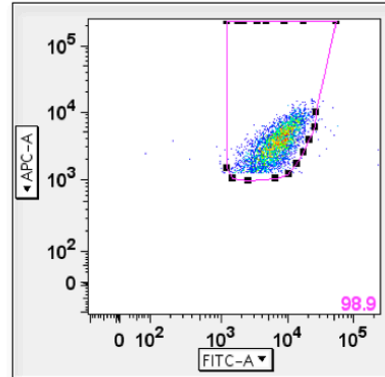

**c**

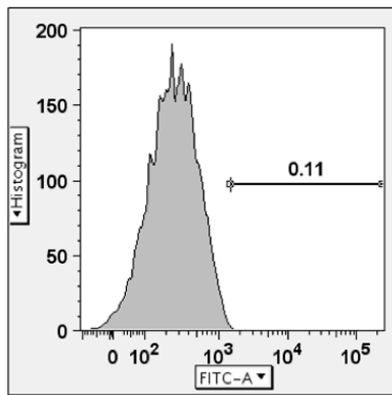

**d**

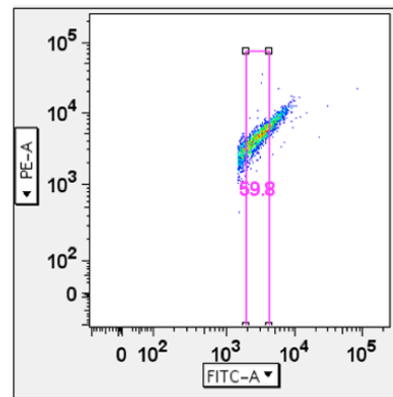

**e**

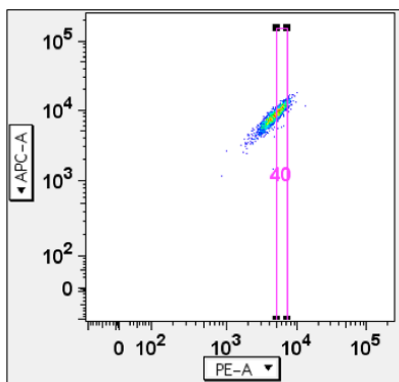



Figure S6, related to Figure 5. Raw data from the flow cytometric tethered cleavage assay for I-PanMI against DNA substrates containing all possible 'central 4' basepair sequences.

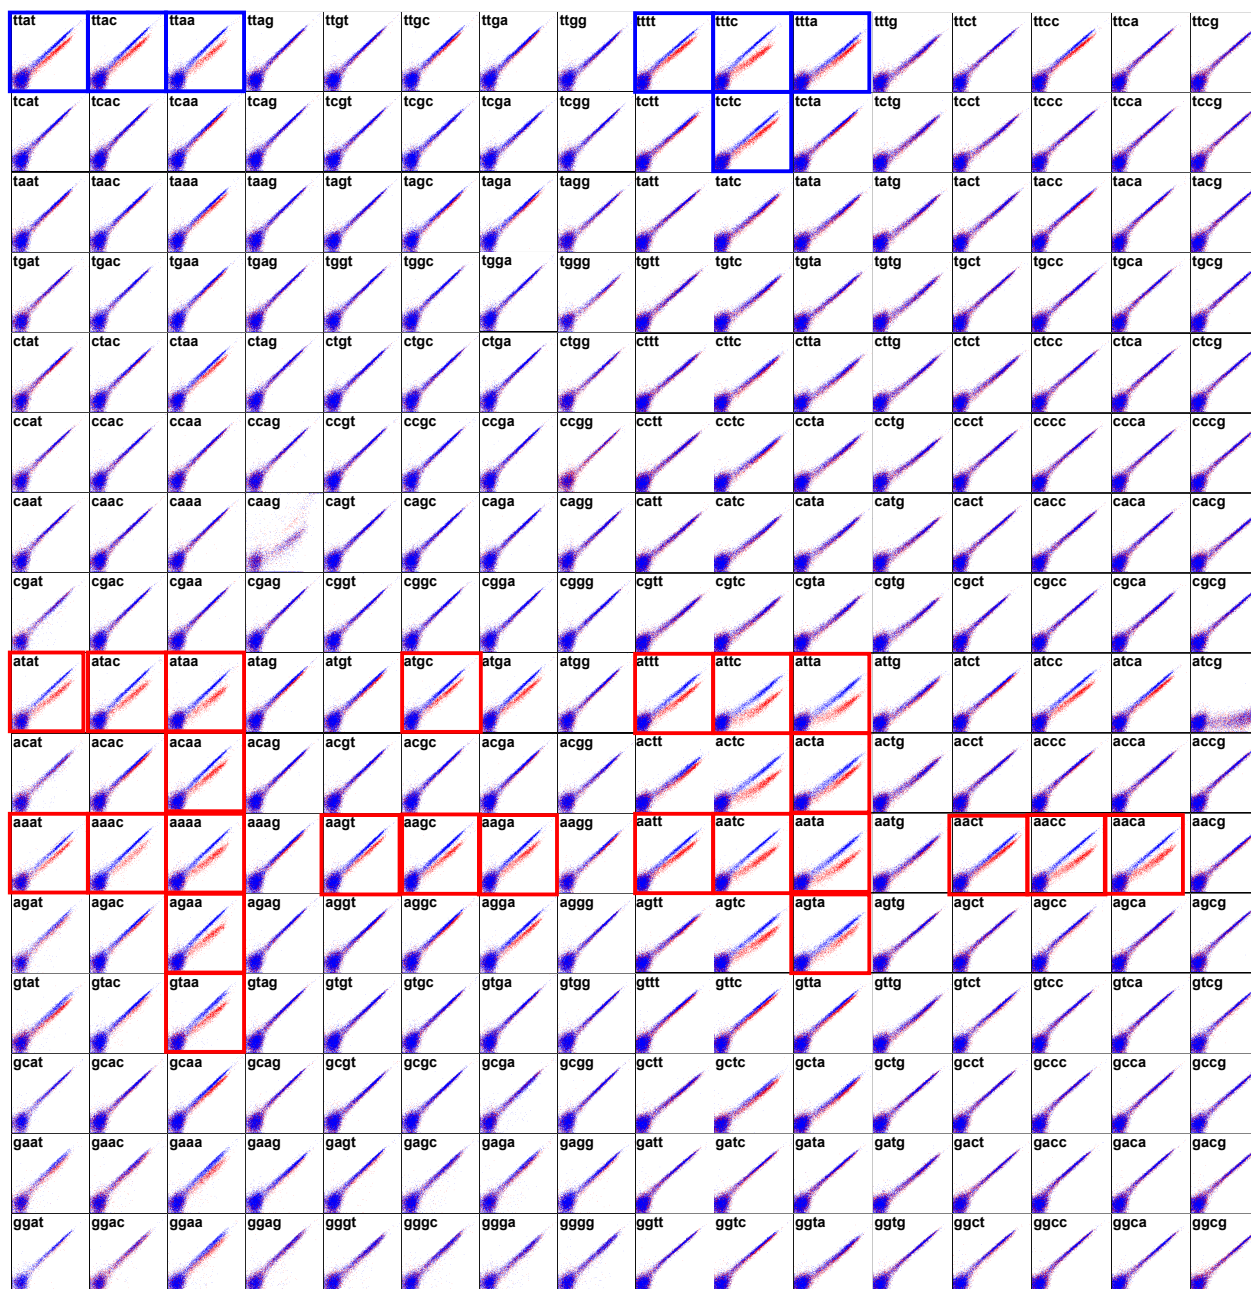

Figure S7, related to Figure 6. 3DNA structural analysis of overall DNA bending induced by binding of I-SmaMI to wildtype and mutated DNA target sequences.

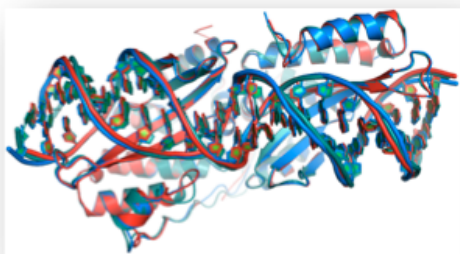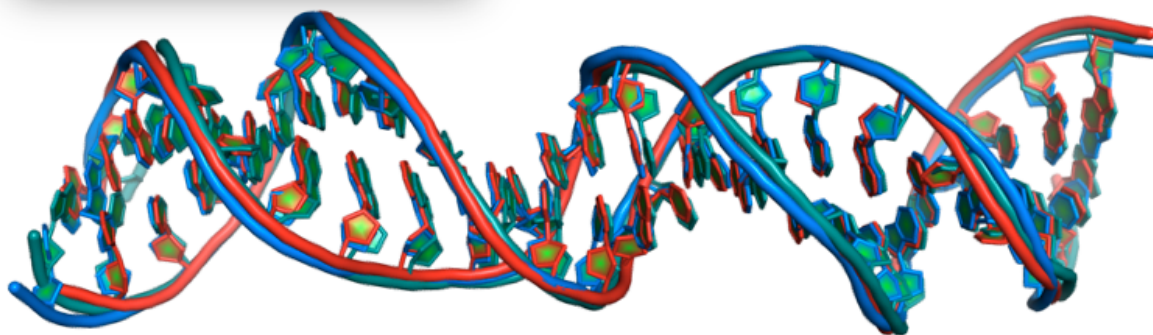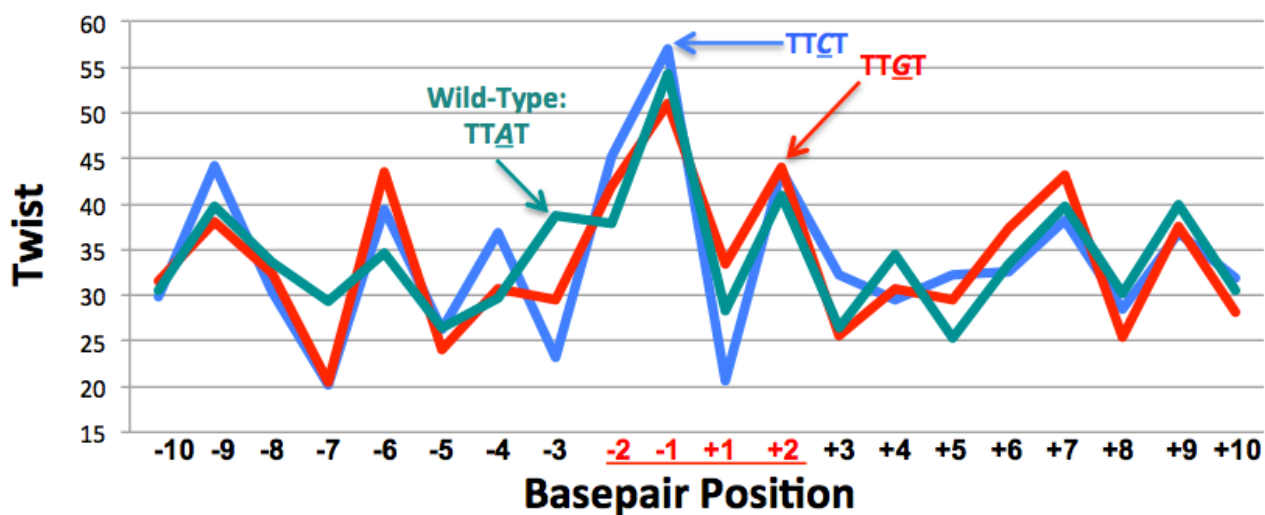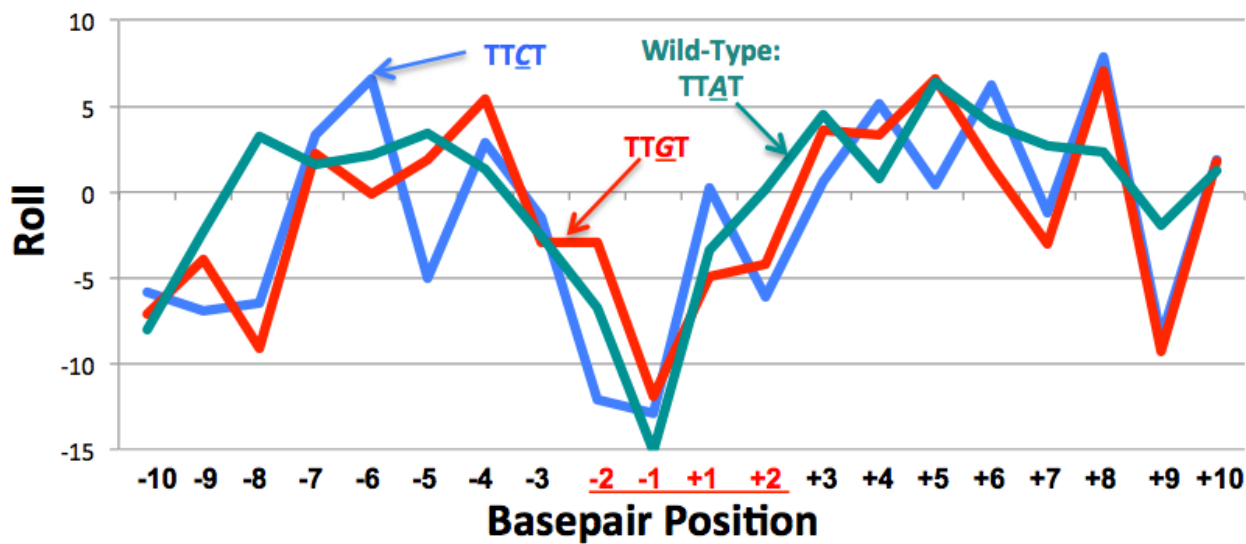



Figure S8, related to Figures 4 and 6. Central four cleavage specificity of I-SmaMI in the presence of  $Mg^{2+}$  vs.  $Mn^{2+}$ .

### Central Four Specificity of I-SmaMI in the Presence of $Mg^{2+}$

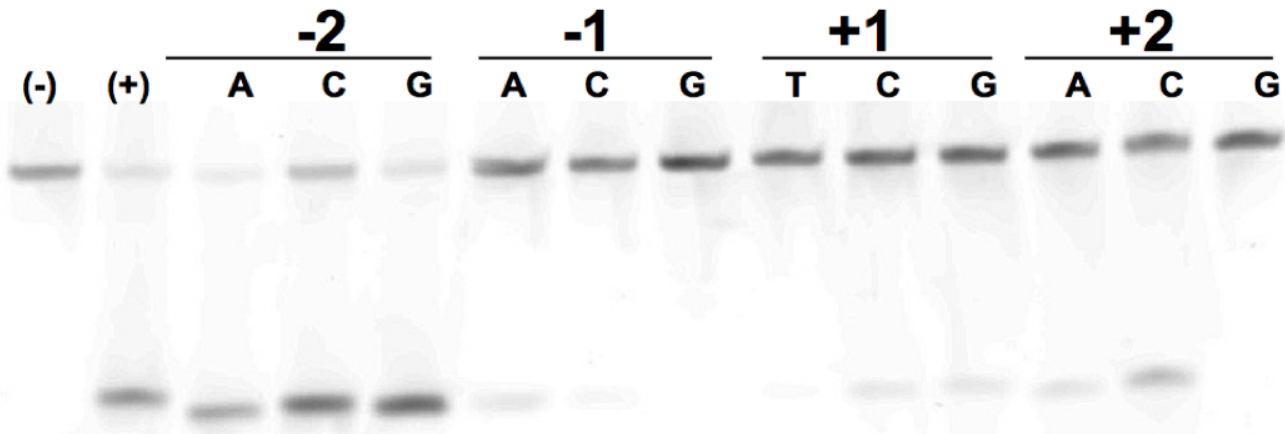

### Central Four Specificity of I-SmaMI in the Presence of $Mn^{2+}$

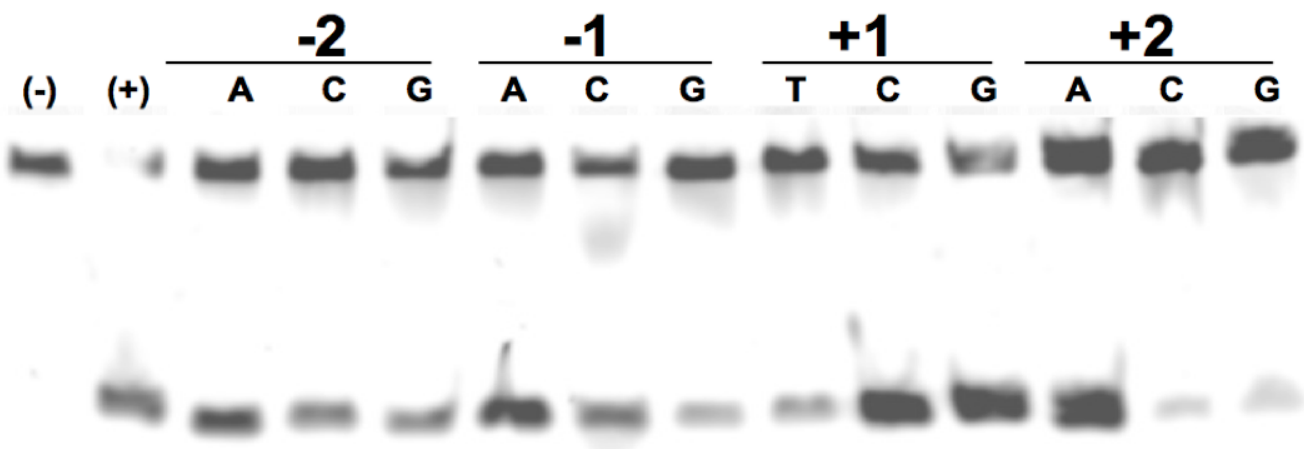

**Table S1, related to Figure 1.** I-OnuI family meganucleases characterized in this study.

| Nuclease  | Host organism                    | Host Gene                                | Surface Expression | Cleavage Activity | Crystal structure |
|-----------|----------------------------------|------------------------------------------|--------------------|-------------------|-------------------|
| I-AabMI   | <i>Ascocalyx abietina</i>        | Small subunit ribosomal RNA gene         | ✓                  | ✓                 | ✓                 |
| I-AaeMIP  | <i>Agrocybe aegerita</i>         | Small subunit ribosomal RNA gene         |                    |                   |                   |
| I-ApaMIP  | <i>Amoebidium parasiticum</i>    | Large subunit ribosomal RNA gene         |                    |                   |                   |
| I-CkaMI   | <i>Cordyceps kanzashiana</i>     | Small subunit ribosomal RNA gene         | ✓                  | ✓                 |                   |
| I-CpaMI   | <i>Cryphonectria parasitica</i>  | Small subunit ribosomal RNA gene         | ✓                  | ✓                 | ✓                 |
| I-CpaMIIP | <i>Cryphonectria parasitica</i>  | S5 ribosomal protein                     | ✓                  |                   |                   |
| I-CpaMIIP | <i>Cryphonectria parasitica</i>  | Small subunit ribosomal RNA gene         | ✓                  |                   |                   |
| I-CraMI   | <i>Cordyceps ramosopulvinata</i> | Small subunit ribosomal RNA gene         | ✓                  | ✓                 |                   |
| I-GpeMI   | <i>Grosmannia penicillata</i>    | Large subunit ribosomal RNA gene         | ✓                  | ✓                 | ✓                 |
| I-Gpil    | <i>Grosmannia piceiperda</i>     | Large subunit ribosomal RNA gene         | ✓                  | ✓                 |                   |
| I-Gzel    | <i>Gibberella zeae</i>           | NADH:ubiquinone oxidoreductase subunit 3 | ✓                  | ✓                 |                   |
| I-Gzell   | <i>Gibberella zeae</i>           | NADH:ubiquinone oxidoreductase subunit 2 | ✓                  | ✓                 | ✓                 |
| I-GzeMIIP | <i>Gibberella zeae</i>           | NADH:ubiquinone oxidoreductase subunit 2 |                    |                   |                   |
| I-HjeMII  | <i>Hypocrea jecorina</i>         | NADH dehydrogenase subunit 2             | ✓                  | ✓                 |                   |
| I-Ltrl    | <i>Leptographium truncatum</i>   | Large subunit ribosomal RNA gene         | ✓                  | ✓                 | ✓                 |
| I-LtrWI   | <i>Leptographium truncatum</i>   | Small subunit ribosomal RNA gene         | ✓                  | ✓                 | ✓                 |
| I-MpeMI   | <i>Moniliophthora perniciosa</i> | NADH dehydrogenase subunit 4             | ✓                  | ✓                 |                   |
| I-MveMIP  | <i>Mortierella verticillata</i>  | Small subunit ribosomal RNA gene         | ✓                  |                   |                   |
| I-NcrMIP  | <i>Neurospora crassa</i>         | ATPase subunit 8                         |                    |                   |                   |
| I-OnuI    | <i>Ophiostoma novo-ulmi</i>      | Large subunit ribosomal RNA gene         | ✓                  | ✓                 | ✓                 |
| I-OsoMI   | <i>Ophiocordyceps sobolifera</i> | Small subunit ribosomal RNA gene         | ✓                  | ✓                 |                   |
| I-OsoMII  | <i>Ophiocordyceps sobolifera</i> | Small subunit ribosomal RNA gene         | ✓                  | ✓                 |                   |
| I-OsoMIIP | <i>Ophiocordyceps sobolifera</i> | Small subunit ribosomal RNA gene         |                    |                   |                   |
| I-OsoMIVP | <i>Ophiocordyceps sobolifera</i> | Small subunit ribosomal RNA gene         |                    |                   |                   |
| I-PanMI   | <i>Podospora anserina</i>        | NADH dehydrogenase subunit 2             | ✓                  | ✓                 | ✓                 |
| I-PanMIIP | <i>Podospora anserina</i>        | cytochrome c oxidase cox1                |                    |                   |                   |
| I-PanMIIP | <i>Podospora anserina</i>        | Dod ND4L i2 grp IC protein               |                    |                   |                   |
| I-PnoMI   | <i>Phaeosphaeria nodorum</i>     | NADH dehydrogenase subunit 5             | ✓                  |                   |                   |
| I-ScuMIP  | <i>Smittium culisetae</i>        | Large subunit ribosomal RNA gene         |                    |                   |                   |
| I-ScuMIIP | <i>Smittium culisetae</i>        | cytochrome c oxidase cox1                |                    |                   |                   |
| I-ScuMIIP | <i>Smittium culisetae</i>        | cytochrome c oxidase cox1                |                    |                   |                   |
| I-ScuMIVP | <i>Smittium culisetae</i>        | cytochrome c oxidase cox1                |                    |                   |                   |
| I-SmaMI   | <i>Sordaria macrospora</i>       | cytochrome c oxidase cox1                | ✓                  | ✓                 | ✓                 |
| I-SscMI   | <i>Sclerotinia sclerotiorum</i>  | Small subunit ribosomal RNA gene         | ✓                  | ✓                 |                   |

# Supplemental Experimental Procedures

## 1. Meganuclease Sequences (coding and translated)

**Note:** Highlighted residues are mutations designed to decrease surface hydrophobicity

### I-AabMI (AF284853)

STSDNNGNIKINPWFLTGFDGEGCFRISVTKINRAIDWRVQLFFQINLHEKDRALLESIKDYLGVGKIHISGKN  
LVQYRIQTFDEL TILIKHLKEYPLVSKKRADFELFNTAHKLIK<sup>N</sup>NEHLNKEGI<sup>N</sup>NKLVSLKASLNGLSE<sup>S</sup>SLKLA  
FPNVISATRLTDFTVNIPDPHWLSGFASAEGCFMVGIAKSSASSTGYQVYLTFILTOHVRDE<sup>N</sup>NLMKCLVDYFN  
WGRLARKRNVYEYQVSKFSDVEKLL<sup>S</sup>FFDKYPILGEKAKDL<sup>Q</sup>DFCSVSDLMKSKTHLTE<sup>E</sup>GVAKIRKIKEGM  
NRGR

TCTACTTCTGACAACAACGGTAACATCAAGATCAACCCATGGTTCCTGACTGGTTTCATCGACGGTGAAGGTTG  
TTTCAGAATCTCTGTCACTAAGATCAACAGAGCTATCGACTGGAGAGTCCAGCTGTTCTTCCAGATCAACCTGC  
ACGAAAAGGACAGAGCTCTGCTGGAATCTATCAAGGACTATCTGGGTGTCGGTAAGATCCACATCTCTGGTAA  
GAACCTGGTCCAGTATAGAATCCAGACTTTCGACGAACTGACTATCCTGATCAAGCACCTGAAGGAATATCCA  
CTGGTCTCTAAGAAGAGAGCTGACTTCGAACTGTTCAACACTGCTCACAAGCTGATCAAGAACAACGAACACC  
TGAACAAGGAAGGTATCAACAAGCTGGTCTCTCTGAAGGCTTCTCTGAACCTGGGTCTGTCTGAATCTCTGAAG  
CTGGCTTTCCCAAACGTCATCTCTGCTACTAGACTGACTGACTTCACTGTCAACATCCCAGACCCACACTGGCT  
GTCTGGTTTCGCTTCTGCTGAAGGTTGTTTCATGGTCGGTATCGCTAAGTCTTCTGCTTCTTCTACTGGTTATCA  
GGTCTATCTGACTTTCATCCTGACTCAGCACGTCAGAGACGAAAACCTGATGAAGTGTCTGGTCGACTATTTCA  
ACTGGGGTAGACTGGCTAGAAAGAGAAACGTCTATGAATATCAGGTCTCTAAGTCTCTGACGTCGAAAAGCT  
GCTGTCTTCTTCGACAAGTATCCAATCCTGGGTGAAAAGGCTAAGGACCTGCAGGACTTCTGTTCTGTCTCTG  
ACCTGATGAAGTCTAAGACTCACCTGACTGAAGAAGGTGTCGCTAAGATCAGAAAAGATCAAGGAAGGTATGA  
ACAGAGGTAGA

### I-CpaMI (AAB84212.1)

NTSSSNPWFLTGFSDAECSFSILIQANSKYSTGWRIKPVFAIGLHKD<sup>N</sup>NELLKRIQSYLGVGKIHGKDSIQF  
RIDSPKELEVIINHFNENYPLVTAK<sup>Q</sup>ADYTLFKKALDVI<sup>K</sup>NKEHLSQKGLLKLVGIKASLNGLNGLSLKEAFPN  
WEELQIDRPSYV<sup>N</sup>KGIPDPNWISGFASGDSSFNKISNSPTSLLNKRVQLRFGIGLNIREKALIQYLVA YFDLSD  
NLKNIYFDLNSARFEVVKFSDITDKIIPFFDKYSIQGKKS<sup>Q</sup>DY<sup>Q</sup>NFKEVADIIKSKNHLTSEGFQEILDIKASMN  
K

AACACTTCTTCTTCTTCAACCCATGGTTCCTGACTGGTTTCTCTGACGCTGAATGTTCTTCTCTATCCTGATCC  
AGGCTAACTCTAAGTATTCTACTGGTTGGAGAATCAAGCCAGTCTTCGCTATCGGTCTGCACAAGAAGGACAA  
CGAACTGCTGAAGAGAATCCAGTCTTATCTGGGTGTCGGTAAGATCCACATCCACGGTAAGGACTCTATCCAG  
TTCAGAATCGACTCTCAAAGGAACTGGAAGTCATCATCAACCACTTCGAAAACCTATCCACTGGTCACTGCTAA  
GCAGGCTGACTATACTCTGTTCAAGAAGGCTCTGGACGTCATCAAGAACAAGGAACACCTGTCTCAGAAGGGT  
CTGCTGAAGCTGGTCGGTATCAAGGCTTCTCTGAACCTGGGTCTGAACGGTCTCTGAAGGAAGCTTTCCCAA  
CTGGGAAGAACTGCAGATCGACAGACCATCTTATGTCAACAAGGGTATCCCAGACCCAACTGGATCTCTGGT  
TTCGCTTCTGGTGACTTCTTTCAACGTCAAGATCTCTAACTCTCCAACCTTCTCTGCTGAACAAGAGAGTCCAG  
CTGAGATTCCGGTATCGGTCTGAACATCAGAGAAAAGGCTCTGATCCAGTATCTGGTCGCTTATTTTCGACCTGTC  
TGACAACCTGAAGAACATCTATTTTCGACCTGAACTCTGCTAGATTCAAGTCTGTAAGTCTCTGACATCACTG  
ACAAGATCATCCCATTCTTCGACAAGTATTCTATCCAGGGTAAGAAGTCTCAGGACTATCAGAACCTCAAGGA  
AGTCGCTGACATCATCAAGTCTAAGAACCACCTGACTTCTGAAGGTTTCCAGGAAATCCTGGACATCAAGGCTT  
CTATGAACAAG

### I-GpeMI (ACV41146.1)

PTRNESINPWVLTGFADAEGSFILRIRNNKSSAGYSTELGFQITLHKD<sup>K</sup>SILENIQSTWKVGVIANSGDNAVS  
LKVTRFEDLRVVLNHFKEYPLITQKLGDYLLFKQAFVSMENKEHLKIEGIRLVGIKANLNWGLTDELKEAF  
VASGGENIFVASGGERSLINKNIPNSGWLAGFTSGEGCFVSLIKSKSKLGVQVQLVFSITQHARDRE<sup>E</sup>LMDNLV  
TYLGCGYIKEKKKSEFSWLEFVVKFSDIKDKIIPVFQ<sup>E</sup>ENNIIGVKLEDFEDWCKVAKLIEKKHLTESGLEEI  
RNIKLNMNKGRVL

CCAAGTAGAAACGAATCTATCAACCCATGGGTCTGACTGGTTTCGCTGACGCTGAAGGTTCTTTCATCCTGAG  
AATCAGAAACAACAACAAGTCTTCTGCTGCTTATCTACTGAACTGGCTTTCAGATCACTCTGCACAAGAAGG

ACAAGTCTATCCTGGAAAACATCCAGTCTACTTGGAAAGGTCGGTGTGCATCGCTAACTCTGGTGACAACGCTGTC  
TCTCTGAAGGTCAGTACTGATTCGAAGACCTGAGAGTCGTCCTGAACCACTTCGAAAAGTATCCACTGATCACTCA  
GAAGCTGGGTGACTATCTGCTGTTCAAGCAGGCTTTCTCTGTCATGGAAAACAAGGAACACCTGAAGATCGAA  
GGTATCAAGAGACTGGTCGGTATCAAGGCTAACCTGAACTGGGGTCTGACTGACGAAGTGAAGGAAGCTTTTCG  
TCGCTTCTGGTGGTGAAAACATCTTCGTCGCTTCTGGTGGTGAAAGATCTCTGATCAACAAGAACATCCCAAAC  
TCTGGTTGGCTGGCTGGTTTCACTTCTGGTGAAGGTTGTTTCTTCGTCTCTCTGATCAAGTCTAAGTCTAAGCTG  
GGTGTCCAGGTCCAGCTGGTCTTCTCTATCACTCAGCACGCTAGAGACAGAGAACTGATGGACAACCTGGTCA  
CTTATCTGGGTTGTGGTTATATCAAGGAAAAGAAGAAGTCTGAATTCTCTGGCTGGAATTTCGTCGTCACCTAAG  
TTCTCTGACATCAAGGACAAGATCATCCCAGTCTTCAGGAAAACAACATCATCGGTGTCAAGCTGGAAGACT  
TCGAAGACTGGTGTAAAGTCGCTAAGCTGATCGAAGAAAAGAAGCACCTGACTGAATCTGGTCTGGAAGAAAT  
CAGAAACATCAAGCTGAACATGAACAAGGGTAGAGTCTG

**I-GzeII** (ABC86622.1)

**DLSTS**INPWFVTGFTDAEGSFMHLEKNKDKWRVRPTFQIKLDIRD**K**SLLEEIK**N**YFNNTGSINTSNKECVYK**V**  
RSLKDISHHSHFDKYNLITQKKADFELFK**K**IINKLNSQEHLSEYEVGATV**L**QEIISIRASMN**L**GLSSSVKEDFP**HIIP**  
**SNR**PLIENM**N**IPHPEWMAGFVSGEGSFSVYTTSDDKYVLSFRV**S**QH**N**KDKQLLKS**F**VDFGCGGFNYHN**K**  
NKAVIFVTRKFEDINDKI**PL**FNEYKIKGVKYKDFK**D**WS**K**VAKMIESKSHLTTNGYKEICKIKENMNSYRKSS**V**  
N

GACCTGTCTACTTCTATCAACCCATGGTTCGTCACTGGTTTCACTGACGCTGAAGGTTCTTTCATGATCCACCTG  
GAAAAGAACAAGGACAAGTGGAGAGTCAGACCAACTTTCCAGATCAAGCTGGACATCAGAGACAAGTCTCTG  
CTGGAAGAAATCAAGAACTATTTCAACAACACTGGTTCATCAACACTTCTAACAAGGAATGTGTCTATAAGG  
TCAGATCTCTGAAGGACATCTCTATCATCATCTCTCACTTCGACAAGTATAACCTGATCACTCAGAAGAAGGCT  
GACTTCGAACTGTTCAAGAAGATCATCAACAAGCTGAACTCTCAGGAACACCTGTCTTATGAAGTCGGTGCTA  
CTGTCTGCAGGAAATCATCTCTATCAGAGCTTCTATGAACCTGGGTCTGTCTTCTTCTGTCAAGGAAGACTTCC  
CACACATCATCCCATCTAACAGACCACTGATCGAAAACATGAACATCCCACACCCAGAATGGATGGCTGGTTT  
CGTCTCTGGTGAAGGTTCTTCTCTGTCTATACTACTTCTGACGACAAGTATGTCTCTCTGTCTTTCAGAGTCTCT  
CAGCACAACAAGGACAAGCAGCTGCTGAAGTCTTTCGTCGACTTCTTCGGTGTGGTGGTTTCAACTATCACAA  
CAAGGGTAACAAGGCTGTCTTTCGTCAGTAAAGTTCGAAGACATCAACGACAAGATCATCCCAGTCTTCC  
AACGAATATAAGATCAAGGGTGTCAAGTATAAGGACTTCAAGGACTGGTCTAAGGTCGCTAAGATGATCGAAT  
CTAAGTCTCACCTGACTACTAACGGTTATAAGGAAATCTGTAAGATCAAGGAAAACATGAACTCTTATAGAAA  
GTCTTCTGTCAAC

**I-LtrWI** (ADN05145.1)

MINLKNNIEYLNWYICGLVDAEGSFGVNVVKHATNKTYAVLTYFELAMNSKDKQ**L**LELIK**K**TFDLECN**IYH**  
NPSDDLKFKVSNIEQIVNKIIPFFEKYTLFSQKRGDFILFCKVVELIK**N**KEHLTLN**L**N**K**ILSIKAAMN**L**GLSE  
NLKKEFPGLSVKRPEFGLSNLNKRWLAGFIEGEACFFVSIYNSPKSK**L**GKAVQLVFKITQH**IRD**KILIESIV**L**  
LNCGRVEVRKSNEACDFTVTSIKEIENYIIPFFNEYPLIGQ**L**KLNYEDFK**K**IFDMM**K**TKDHLTEEGLSK**IE**IK**N**  
KMNTNR

ATGATCAACCTGAAGAACAACATCGAATATCTGAACTGGTATATCTGTGGTCTGGTCGACGCTGAAGGTTCTTT  
CGGTGTCAACGTCGTCAGCAGCTACTAACAAGACTGGTTATGCTGTCTGACTTATTTTCGAACTGGCTATGA  
ACTCTAAGGACAAGCAGCTGCTGGAAGTCAAGAGACTTTTCGACCTGGAATGTAACATCTATCACAAACC  
ATCTGACGACACTCTGAAGTTCAGGTTCTAACATCGAACAGATCGTCAACAAGATCATCCCATTCTTCGAAA  
AGTATACTCTGTTCTCTCAGAAGAGAGGTGACTTCATCCTGTTCTGTAAGGTCGTCGAACTGATCAAGAACAAG  
GAACACCTGACTCTGAACGGTCTGAACAAGATCCTGTCTATCAAGGCTGCTATGAACCTGGGTCTGTCTGAAA  
ACCTGAAGAAGGAATTCCCAGGTTGTCTGTCTGTCAAGAGACCAGAATTCGGTCTGTCTAACCTGAACAAGAG  
ATGGCTGGCTGGTTTTCATCGAAGGTGAAGCTTGTCTTCTTCGTCCTATCTATAACTCTCCAAAGTCTAAGCTGG  
TAAGGCTGTCCAGCTGGTCTTCAAGATCACTCAGCACATCAGAGACAAGATCCTGATCGAATCTATCGTCGAA  
CTGCTGAACTGTGGTAGAGTCGAAGTCAGAAAGTCTAACGAAGCTTGTGACTTCACTGTCACTTCTATCAAGGA  
AATCGAAAACATATCATCCCATTCTTCAACGAATATCCACTGATCGGTGAGAAGCTGAAGAAGTATGAAGAC  
TTCAAGAAGATCTTCGACATGATGAAGACTAAGGACCACCTGACTGAAGAAGGCTGTCTAAGATCATCGAAA  
TCAAGAACAAGATGAACACTAACAGA

**I-PanMI** (NP\_074914.1)

STLESKLNPSYISGFVDGEGSFMLTIHKDNKYKLGWRVVCRFVISLHKKDLSLLNKI**K**EFFDVG**N**VFLMT**K**DSA  
QYRVESL**K**GLDLI**N**HFDKYPLIT**K**KQADYK**L**FKMAHNL**I**KNKSHL**T**KEGLLE**L**V**A**IKAVIN**N**GL**N**DL**S**IA**F**P  
GINTILRPDT**S**LPQIL**N**PF**W**LSGF**V**DAEG**C**FS**V**V**F**KS**K**TS**L**GE**A**V**K**LS**F**ILT**Q**SN**R**DE**Y**LI**K**SL**I**E**Y**LG**C**GN**T**

**SLDPRGTIDFKVTNFSSIKDIIVPFFIKYPLKGNKLDFTDFCEVVRLMENKSHLTKEGLDQIKKIRNRMNTNR  
K**

TCTACTTTGGAATCTAAGTTGAACCCATCTTACATCTCTGGTTTCGTCGACGGTGAAGGTTCTTTTCATGTTGACT  
ATCATCAAGGACAACAAGTACAAGTTGGGTTGGAGAGTTGTTTGTAGATTTCGTTATCTCTTTGCACAAGAAGG  
ACTTGTCTTTGTTGAACAAGATCAAGGAATTTTCGACGTCGGTAACGTTTTCTTGATGACTAAGGACTCTGCTC  
AATACAGAGTTGAATCTTTGAAGGGTTTGGACTTGATCATCAACCCTTCGACAAGTACCCATTGATCACTAAG  
AAGCAAGCTGACTACAAGTTGTTCAAGATGGCTCACAACCTAATTAAGAACAAGTCTCACTTGACTAAGGAAG  
GTTTGTGGAATTGGTTGCTATCAAGGCTGTTATCAACAACGGTTTGAACAACGACTTGCTATCGCTTTCCCA  
GGTATCAACACTATCTTGAGGCCTGACACTTCTTTGCCACAAATCTTGAACCCATTCTGGTTGCTGGTTTCGTT  
GACGCTGAAGGTTGTTTCTCTGTTGTTGTTTTCAAGTCTAAGACTTCTAAGTTGGGTGAAGCTGTTAAGTTGCT  
TTCATCTTGACTCAATCTAACAGAGACGAATACTTGATCAAGTCTTTGATCGAATACCTAGGTTGTGGTAACAC  
TTCTTTGGACCCAAGAGGTAATCGACTCAAGGTTACTAAGTCTCTTCTATCAAGGACATCATCGTTCCATT  
CTTCATCAAGTACCCATTGAAGGGTAACAAGAAGTGGACTTCACTGACTTCTGTGAAGTTGTTAGATTGATGG  
AAAACAAGTCTCACTTGACTAAGGAAGGTTTGACCAATCAAGAAGATCAGAAACAGAATGAACACTAACA  
GAAAG

I-SmaMI (XP\_003342391.1)

**SKGENSKLNPWAVVGFIDAEGSFMVRVRKNSKYKTGWLVAIFSVDKDLFLESLKTFFGGLGSIKKS  
NSTFSYRIESSEQLTKIILPFDKYSLITEKLGDYLLFKVLELMGTKEHLTQRGLEKIVSLKASINKGLSEELQ  
AAFPQCVPTPRPEINNKNIPDPFWLAGFVSGDGSFKSILKKSESIKVGFSILVFQITQHARDVKLMESLISYLG  
CGFIEKDSRGPWLYYTVTNFSDIQGKIIPFFHQYKIIGSKYGDYQDWCKIALIMQNKNHLTPEGLNEIRALKG  
GMNKGRL**

TCTAAGGGTGAAAACCTAAGCTGAACCCATGGGCTGTCGTCGGTTTCATCGACGCTGAAGGTTCTTTTCATGGT  
CAGAGTCAGAAAGAACTCTAAGTATAAGACTGGTTGGCTGGTCGTCGCTATCTTCTCTGTCACTGTCGACAAGA  
AGGACCTGTTCTGCTGGAATCTCTGAAGACTTTCTTCGGTGGTCTGGGTTCTATCAAGAAGTCTGGTAACTCT  
ACTTTCTTATAGAATCGAATCTTCTGAACAGCTGACTAAGATCATCCTGCCATTCTTCGACAAGTATTCTCTG  
ATCACTGAAAAGCTGGGTGACTATCTGCTGTTCAAGAAGTCTGGAAGTACTGAGGAAACACCTGA  
CTCAGAGAGGTCTGAAAAGATCGTCTCTCTGAAGGCTTCTATCAACAAGGGTCTGTCTGAAGAAGTGCAGGC  
TGCTTTCCACAGTGTGTCCCAACTCCAAGACCAGAAATCAACAACAAGAACATCCAGACCCATTCTGGCTG  
GCTGGTTTCGTCCTCTGGTGACGGTCTTTCAAGTCTATCTGAAGAAGTCTGAATCTATCAAGGTCGGTTCCAG  
TCTATCCTGGTCTTCCAGATCACTCAGCAGCTAGAGACGTCGAAGTCTGATGGAATCTCTGATCTTATCTGGG  
TTGTGGTTTCATCGAAAAGGACTCTAGAGGTCCATGGCTGTATTACTGTCACTAAGTCTCTGACATCCAGG  
GTAAGATCATCCATTCTTCCACCAGTATAAGATCATCGGTTCTAAGTATGGTGACTATCAGGACTGGTGTAAG  
ATCGCTCTGATCATGCAGAAACAAGAACCCTGACTCCAGAAGGTCTGAACGAAATCAGAGCTCTGAAGGGTG  
GTATGAACAAGGGTAGACTG

## **2. Enzyme expression, purification, biochemical analyses, crystallization and X-ray data collection**

Sequence verified plasmids were transformed into BL21(DE3) RIL *E. coli* cells and plated on LB-Amp plates to grow at 37°C.

Colonies were grown in 10 mL overnight cultures of LB + Amp (100 µg/mL) and diluted 1:100 the next day to a final volume of 1 L.

Cell cultures were shaken at 37°C until the cells reached an OD<sub>600</sub> between 0.6-0.8. Cells were then incubated on ice for 30 minutes, induced with 200 mM IPTG, and incubated overnight at 16°C. Induced cells were pelleted and stored at -20°C. Successful protein induction was verified by SDS-PAGE.

**Meganuclease purification.** Cell pellets were resuspended in a buffer containing 25 mM Tris/HCl pH 7.5, 200 mM NaCl, and 5% glycerol. PMSF and benzonase (Sigma-Aldrich) were added to 1 mM concentrations prior to sonication. Cell debris was pelleted and the supernatant was filtered through a 0.20 µm filter. Untagged protein samples were loaded onto a 5 mL Heparin HP HiTrap column (GE Life Sciences) and eluted with a linear salt gradient (Buffer A: 25 mM Tris/HCl pH 7.5, 200 mM NaCl, 5% glycerol, Buffer B: 25 mM Tris/HCl pH 7.5, 1M NaCl). The meganuclease constructs eluted between 400 mM and 800 mM NaCl.

His-tagged proteins were incubated with pre-equilibrated Nickel-NTA resin (approximately 3 mL bed volume), gravity-loaded onto a column, and washed with buffer containing increasing concentrations of imidazole at pH 8.0. Fractions containing eluted protein were concentrated and exchanged to a thrombin cleavage buffer (0.3 M NaCl, 25 mM Tris pH 7.5, and 5% v/v glycerol). The His-tag was

removed with an overnight incubation at 4°C with biotinylated thrombin. The following morning, streptavidin-conjugated agarose resin was added to the sample and incubated for 30 minutes at room temperature. Thrombin was then removed by gravity filtration over an empty column, and pure, tagless protein was collected.

All untagged constructs were then concentrated to 5 - 20 mg/mL and passed over a size exclusion column (15 mL Superdex 200 10/300 GL, GE Life Sciences) in the presence of 25 mM Tris/HCl pH 7.5, 200 mM NaCl, and 5% glycerol.

***Meganuclease thermal stability assays.*** Purified recombinant meganuclease constructs were diluted to between 10-20  $\mu$ M concentration and dialyzed overnight into 10 mM potassium phosphate buffer at pH 8.0. Circular dichroism (CD) thermal denaturation experiments were performed on a JASCO J-815 CD spectrometer with a Peltier thermostat. Initial wavelength scans (190-250 nm) were carried out for each construct at 20°C and 80°C; the wavelength where the change in CD signal strength was greatest (210 nm) was used for the variable temperature scan. Thermal denaturation was monitored over a temperature range of 4°C to 95°C (0.1 cm pathlength cell), with measurements taken every 2 degrees. Sample temperature was allowed to equilibrate for 30 seconds before each measurement. Thermal denaturation half-points ( $T_m$  values) were determined by curve-fitting using the SpectraManager software supplied by the instrument manufacturer.

***DNA cleavage assays.*** To complement our flow cytometric DNA cleavage assay results, we also performed a *non-tethered* cleavage assay using either enzyme released from the surface of yeast or purified recombinant protein (as was used in our structural studies). For enzyme released from the surface of yeast, 5 million induced yeast cells were washed with OCB and mixed in a 45  $\mu$ L volume with 10 mM DTT (breaks the disulfide bond linking the protein to the yeast cell surface), OCB, 20 nM A647-labeled DNA target substrate, and 5 mM  $\text{CaCl}_2$  (no cleavage control),  $\text{MgCl}_2$  (cleavage), or  $\text{MnCl}_2$  (reduced specificity). For purified recombinant enzyme, the same reactions were set up with a final enzyme concentration of 10 nM and no DTT. The digest reactions were incubated at 37°C for 30 minutes. A colorless Ficoll loading dye was added to each reaction before loading samples onto an 11.5% acrylamide gel (120 volts for 1 hour). Cleavage products were visualized with the red laser (633nm) and a 670 BP 30 filter on a Typhoon Trio imaging system (GE Healthcare), and quantification of bands was performed using Image Studio (LICOR) software.

***Meganuclease-DNA crystallization and data collection.*** Recombinant proteins were incubated with either  $\text{CaCl}_2$  or  $\text{MgCl}_2$  and a double-stranded DNA oligonucleotide (IDT) containing the enzyme's 22 bp target site with various lengths of flanking random sequence with either blunt ends, single base 3' overhangs or single base 5' overhangs. The mixtures were set up at a 1 : 1.15 protein:DNA ratio. Crystallization of the protein/DNA complexes was initially screened in 96-well trays using a mosquito robot (TPP Labtech) with three pre-made crystallization grids: PEGs Suite (Qiagen), Index I & II (Hampton Research), and Wizard Classic (Rigaku/Emerald BioStructures). Crystal hits from initial screens were further optimized in larger scale 24-well hanging drop trays. Detailed crystallization and cryoprotection conditions for each meganuclease are provided in the **Supplemental Experimental Procedures**.

Data was collected either on a Rigaku Micromax 007HF rotating anode generator with a RaxisIV++ or Saturn 944+ detector or at the Advanced Light Source (Beamline 5.0.1 or 5.0.2). Data was processed using HKL2000 (Otwinowski and Minor, 1997). Phases were obtained by molecular replacement with Phaser (McCoy et al., 2007) using either the I-OnuI structure (PDB ID 3QQY) or the I-LtrI structure (PDB ID 3R7P) as a search model. Model building and refinement were performed using Coot (Emsley et al., 2010) and Refmac (Murshudov et al., 1997), respectively.



**I-AabMI** crystallized in 25% (w/v) PEG 550 MME, 0.1M HEPES pH 7.5, and 20mM CaCl<sub>2</sub> with a 25bp duplex DNA + a single base 3' overhang:

Top: 5'-CAGGTACCCTTTAAACCTACTAACCC-3'  
Bottom: 5'-GGTTAGTAGGTTTAAAGGGTACCTGG-3'

The crystal was cryoprotected in artificial mother liquor with 25% sucrose and flash frozen in liquid nitrogen. Data was collected with a Rigaku Micromax-007HF rotating anode generator on a Saturn944+ detector.

**I-CpaMI** crystallized in 26% (w/v) PEG 3350, 0.1M Tris/HCl pH 7.5, 5mM DTT, and 5mM CaCl<sub>2</sub> with a 27bp duplex DNA + a single base 3' overhang:

Top: 5'-CCTAGCCCACAATATTAAGGCCATCCCA-3'  
Bottom: 5'-GGGATGGCCTTAATATTGTGGGCTAGGT-3'

The crystal was cryoprotected and then flash frozen in liquid nitrogen. Data was collected with a Rigaku Micromax-007HF rotating anode generator on a Saturn944+ detector.

**I-GpeMI** crystallized in 22.5% (w/v) PEG 3000, 0.1M Tris/HCl pH 8.5, and 50mM CaCl<sub>2</sub> with a 26bp duplex DNA + a single base 3' overhang:

Top: 5'-CCTTTCCGCTTATTCAACCCTTTACCC-3'  
Bottom: 5'-GGTAAAGGGTTGAATAAGCGGAAAGGG-3'

The crystal was cryoprotected in artificial mother liquor with 15% ethylene glycol and flash frozen in liquid nitrogen. Data was collected at the Advanced Light Source (Beamline 5.0.1).

**I-GzeII** crystallized in 30% (w/v) PEG 6000, 0.1M HEPES pH 7.5, and 2mM CaCl<sub>2</sub> with a 26bp duplex DNA + a single base 3' overhang:

Top: 5'-CCTTTGTACCAATATGGTACCCATCCC-3'  
Bottom: 5'-GGATGGGTACCATATTGGTACAAAGGG-3'

The crystal was cryoprotected in artificial mother liquor with 20% glycerol and flash frozen in liquid nitrogen. Data was collected at the Advanced Light Source (Beamline 5.0.2).

**I-LtrWI** crystallized in 30% (w/v) PEG-MME 550, 0.1M Bis-Tris pH 6.5, and 50mM CaCl<sub>2</sub> with a 25bp duplex DNA + a single base 3' overhang:

Top: 5'-CAGTAGTGAAGTATGTTATTTAACCC-3'  
Bottom: 5'-GGTTAAATAACATACTTCACTACTGG-3'

No cryoprotectant was used prior to freezing. Data was collected with a Rigaku Micromax-007HF rotating anode generator on a RaxisIV++ detector.

**I-PanMI** crystallized in 28% PEG 3350, 0.1M Tris pH 7.0 with a 26bp duplex DNA + a single base 5' overhang:

Top: 5'-CCCGCTCCTCATAATCCTTATCAAG-3'  
Bottom: 5'-GGGCTTGAATAAGGATTATGAGGAGC-3'

The crystal was cryoprotected with 15% sucrose and then flash frozen in liquid nitrogen. Data was collected with a Rigaku Micromax-007HF rotating anode generator on a Saturn944+ detector.

**I-SmaMI** crystallized in 28 to 32% (w/v) PEG-MME 550, 0.1M HEPES pH 7.5 and 10 to 20 mM CaCl<sub>2</sub> with a 25bp blunt duplex DNA:

Top: 5'-CGTACACCTGATAATGGAGGATACC-3'  
Bottom: 5'-GGTATCCTCCATTATCAGGTGTACG-3'

No cryoprotectant was used prior to freezing. Data was collected with a Rigaku Micromax-007HF rotating anode generator on a RaxisIV++ detector.

**I-SmaMI** with the “TTCT” one-off DNA substrate crystallized in 25% PEG 3350, 10mM Bis-Tris pH 6.5, and 5mM CaCl<sub>2</sub> with a 27bp duplex DNA + a single base 3’ overhang:

Top: 5’-CCTATCCTCCATTCTCAGGTGTACCACC-3’  
Bottom: 5’-GTGGTACACCTGAGAATGGAGGATAGGG-3’

The crystal was cryoprotected in artificial mother liquor with 15% glycerol and flash frozen in liquid nitrogen. Data was collected at the Advanced Light Source (Beamline 5.0.2).

**I-SmaMI** with the “TTGT” one-off DNA substrate crystallized in 25% PEG 2000 MME, 10mM Tris pH 6.0, and 5mM CaCl<sub>2</sub> with a 25bp duplex DNA + a single base 3’ overhang:

Top: 5’-CTATCCTCCATTGTCAGGTGTACCCC-3’  
Bottom: 5’-GGGTACACCTGACAATGGAGGATAGG-3’

The crystal was cryoprotected in artificial mother liquor with 15% ethylene glycol and flash frozen in liquid nitrogen. Data was collected with a Rigaku Micromax-007HF rotating anode generator on a RaxisIV++ detector.

### 3. Meganuclease Target Site Prediction (Example shown for I-GpeMI)

Run a BLAST search to find a meganuclease of interest in its natural host gene:

Amino acid sequence of GpeMI (trimmed to match the N- and C-termini of I-OnuI):

PTRNESINPWVLTGFADAEGSFILRIRNNKSSAGYSELGFQITLHKKDISILENIQSTWKVGVIANSGDNAVSLKVTRFEDLR  
VVLNHFKEYPLITQKLGDYLLFKQAFSVMENKEHLKIEGIKRLVGIKANLNWGLTDELKEAFVASGGENIFVASGGERSLINK  
NIPNSGWLAFGTSGEFCFFVSLIKSKSLGVVQVQLVFSITQHARDRALMDNLVLYLGCYIKEKKKSEFSWLEFVVTKFSDIK  
DKIIPVFQVNNIIGVKLEDFEDWCKVAKLIEEKKHLTESGLEEIRNIKLNMNKGRVL

Hit from BLAST search for I-GpeMI sequence:

**Organism:** Grosmannia penicillata (straining WIN(M)27)  
**Host gene:** ribosomal protein 3  
**Meganuclease/homing endonuclease coding sequence:** highlighted in yellow

```
>gi|257097851|gb|FJ607136.1| Grosmannia penicillata strain WIN(M)27 large subunit ribosomal RNA (rnl) gene, partial
sequence; and ribosomal protein 3/homing endonuclease-like fusion protein (rps3/HEG fusion) gene, complete cds;
mitochondrial
GGGTTAATTTCAAGAATACTTATACTATAAGTAAATTTGAAGCGAAGTTTATTTATATTTAATAAATAAATAATGTTCAACGACTAAGGGTGAGTTAATAACAATAATCCCTTATTAAT
ACCCAACACTTTTTTTTGTAAATTTAGTTTAAATAATATAAAAATCAATAAAAATGCAAAAATATACCAAAATTTTTAAGTAATATATTTGTCAAAAATATTAATAATAAATAAATCTATA
CCATTGAATACTAGAATTAATTTTGTGGTGAACCTAGATATTTCCCTCTGATTTTAAAGAATGAACATAAGTGTATTACTTTAATTTCTAATAATATTAATAAATTTCCCATTTA
TGACTTAAATGTAAGTAAATTTAAAGGTTATTTGATTTATATTTGATCGTGAATAAATAAATGAAATTTAATAATCTTATGAAAAAAGATTTTACGGCCGAAGCTCTAAATA
AAATCTTTGTAAGTAAACCTGAAATAAAACATACATAAATCTAAAGCCATAAATACTATTTATGTTTATAAATAGAGAAAGAGTATTTTGTAAATAAATAAATCAATTAATAATAGGA
ATTTTAGGACTAAAATAAATTTTATTTATGTAAAAAATCTCTGGGGATTTATATAGTAAATATATTAACAAGTTTATATAAAGAATTCCTATTTTAAAGAAGCTAAAATTA
ACTTAATCTTAATGGATTAATAATCCAAGATAAATCTTATTTAAATTAAGTAAATTAATAAGTAAATTTTATAAAAAAAGTCGAATTTAATATATTAATTTAAATCTATAAAT
TGAATCCTAATATATTTACTGAAATAATGGCAAAAAATTTATGAATAGAAATGCATCTATTATGCAATAATGAAATTTATCTTAGATAAAAGTATTTTAAATGAGGATGGCGGC
ATAGTTTCACTAGCCCTCATCCGGTGTAACTCTCCGGATCAGGATTAGAAAAAAGTAGAAAAATTAATAATGTAATTTAAATTTAATAATAGAAAAAATAAATAAATAAATCTGAATATTA
CTCTATAGTTACTGATGGAGATATAAATGATAATATAAAGAATTTTATACTAAAAATAGTGAAGATACTATTTTGATTCATAATATAAATAATTTAGGAGGTATAGATTAGAAGCTA
AAGGAAGATTGACTAGACGTTATAGAGCGGATAGAGCAGTATCTAAAGTTAATATAAAGGAGGATTGAAAAATATAGATTATCATCTACAAAGGTTTATCTCTTAAATATATAGGA
AAAAATAATTTCAAGTATGGAATATTCAATGGATATATCAAAAACCTCGTGTAGGTCATTTGCTATAAAGGGTTGAATTTTCAGGTAGATCTTACAGTACAACCTGCCAATCTTACAAGAAA
TGAAAGTATAAATCCTTGAGTTCTTACTGGGTTTGCAGATGCTGAAGGTAGTTTATACTAAGAATAAGAAATAAATAAAGTCTCGCAGGTTATCTACAGAAATAGGATTTCAA
TTACTTTGCATAAAAAAGACATATCTATCCTAGAAAAATATCAATCTACTTGAAAAGTAGGAGTTATAGCTAATAGCGGTGATAACGCCGTAAGTTTAAAGTAAACCGGTTGAGGAT
TTAAGAGTAGTATTAATCAATTTTGAAGAAATATCCTTTGATAACTCAAAAATTAGGTGATTTATCTATTTTAAACAAGCCTTTAGTGTATGAAAAAACAAGAACATTTAAAAATTTGA
AGGTATAAAGAATTAGTTGGAATTAAGGCCAATTTAAATTTGAGGTCTTACTGATGAACATAAAGGAGGCTTTTGTGCGCTCCGGCGGTGAAAAATATTTTGTGCGCTCCGGCGGTGAAA
GATCTCTAATAAATAAATAAATACCTAATCTCTGGATGATAGCTGGCTTACTTCTGGTGAGGGTTGTTTTTTTGTAGTTTAAATAAATCTAAATCTAAATTAGGGGTTTCAGGTACAA
TTGGTATTTTCTATTACTCAACACCGCAGAGATAGAGCATTTGATGATAAATTTAGTAAACATATCTTTGGATGAGGATATATTAAGGAAAAAAGAAATCTGAGTTTTCATGATTAGAAT
TGTGTTTCAAAAGTTTTCAGACATTAAGGATAAATAATTTCCAGTTTTTCAAGTAAATATAATAGGTGTAATAATGGAAAGACTTTTGAAGATTGATGTAAGTCGCTAAATTAATG
AAGAAAAAACATTTAACTGAATCAGGCTTGAAGAATAACGTAATATAAATTAACATGAATAAGGAAGAGTTCTTAAAGTTAACTACATACTAAGTGCAGTATATAAATTTCAAT
ATTTAACTCTAGTATATTTTAACTACGTTAGCAAGCTCCCATACTCTCGTATGAGAATAAGCGGAAATAATTTTTTTTAGGTTTAAATTAACAATAAATAAATAAAGTGAAGAAAT
AGTCTGAACCAATTTTGTGAAAAA
```

Run a BLAST search on the sequence prior to the meganuclease (the host gene in which the meganuclease resides):

```
>hostgene
GGGTTAATTTCAAGAATACTTATACTATAAGTAAATTTGAAGCGAAGTTTATTTATATTTAATAAATAAATAATGTTCAACGACTAAGGGTGAGTTAATAACAATAATCCCTTATTAAT
ACCCAACACTTTTTTTTGTAAATTTAGTTTAAATAATATAAAAATCAATAAAAATGCAAAAATATACCAAAATTTTTAAGTAATATATTTGTCAAAAATATTAATAATAAATAAATCTATA
CCATTGAATACTAGAATTAATTTTGTGGTGAACCTAGATATTTCCCTCTGATTTTAAAGAATGAACATAAGTGTATTACTTTAATTTCTAATAATATTAATAAATTTCCCATTTA
TGACTTAAATGTAAGTAAATTTAAAGGTTATTTGATTTATATTTTGGATCGTGAATAAATAAATGAAATTTAATAATCTTATGAAAAAAGATTTTACGGCCGAAGCTCTAAATA
AAATCTTTGTAAGTAAACCTGAAATAAAACATACATAAATCTAAAGCCATAAATACTATTTATGTTTATAAATAGAGAAAGAGTATTTTGTAAATAAATAAATCAATTAATAATAGGA
ATTTTAGGACTAAAATAAATTTTATTTATGTAAAAAATCTCTGGGGATTTATATAGTAAATATATTAACAAGTTTATATAAAGAATTCCTATTTTAAAGAAGCTAAAATTA
AAGTCTGAACCAATTTTGTGAAAAA
```



TGTTGTACAAAGTTTCAGACATTAAGGATAAAATATCCAGTTTTCAAGTAAATAATATAATAGGTGTAAAATTGGAAGACTTTGAAGATTGATGTAAAGTCGCTAAAATTAATTG  
AAGAAAAAACATTTAACTGAATCAGGCTTGAAGAAATACGTAATATAAAATTAACATGAATAAGGAAGAGTTCTTAAAGTAACTACATACTAAGTGCAGTATATAATTTCAAT  
ATTTAACTCTAGTATATTTAATACTACGTTAGCAAGCTCCCATACTTCGTATGAGAAT **AAGCGAAAATAATTTT**TTTAGGTTTAAATTACAATAAATAAAAAAAGTGAAGAAAT  
AGCTGAACCATTTGTGAAAAA

The gray highlighting is extra sequence carried with the meganuclease when it invades the host gene.

Remove the gray and yellow-highlighted sequences to form the predicted target site of the GpeMI enzyme.

Predicted target sequence for GpeMI **TGCTATAAAGGTTGAATAAGCGAAAATAATTTT**

The flow-cytometric cleavage assay can then be used to test for cleavage activity against this predicted target sequence.

#### 4. Generation of DNA Substrates for Assays of Binding and Cleavage

Primer #1 with conjugated Biotin:

5' - /5Biosg/TCAGCACAGCACTACG-3'

Primer #2 with conjugated A647 fluorophore:

5' - /5Alex647N/TGGACACGACTTGAGC-3'

Single-stranded template with 22bp target site:

5' -TGGACACGACTTGAGC**TTTCCACTTATTCAACCTTTT**ACGTAGTGCTGTGCTGA-3'

## References

Emsley, P., Lohkamp, B., Scott, W.G., and Cowtan, K. (2010). Features and development of Coot. *Acta Cryst D* 66, 486 - 501.

McCoy, A.J., Grosse-Kunstleve, R.W., Adams, P.D., Winn, M.D., Storoni, L.C., and Read, R.J. (2007). Phaser crystallographic software. *J. Appl. Crystal.* 40, 658 - 674.

Murshudov, G.N., Vagin, A.A., and Dodson, E.J. (1997). Refinement of macromolecular structures by the maximum-likelihood method. *Acta Cryst D* 53, 240 - 255.

Otwinowski, Z., and Minor, W. (1997). Processing of X-ray Diffraction Data Collected in Oscillation Mode. In *Methods in Enzymology*, J. C. W. Carter, and R.M. Sweet, eds. (Academic Press), pp. 307 - 326.
